# Supplementary material
Source: Springer Nature journal article supplement (https://www.springermedizin.de/resource/supplementary/12913_2009_1062_MOESM3_ESM.pdf/9536244)
Supplement: MOESM3 [file 9536244]

- Health promotion and prevention are separate concepts
- Health promotion is a new task
- Willing to take on a disease preventive role but not a health promoting role
- Focus on pathogenesis, risk and evidence

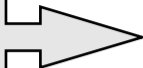

**”The demarcater”**

- Health promotion is an extensive concept that includes prevention
- Health promoting and preventive measures are largely integrated in ordinary work
- Wants to be more involved in health promotion efforts

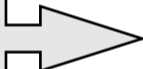

**”The integrater”**

- Health promotion is a companion to primary prevention
- A proactive approach with a focus on salutogenesis and activities within the local community
- The health promotion role is mainly to be developed

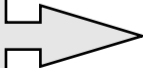

**”The promoter”**
